# Supplementary material for: ICG-Conjugated magnetic graphene oxide for dual photothermal and photodynamic therapy
Source: Royal Society of Chemistry journal article supplement (doi:10.1039/c6ra06798k), 2016-01-01
Supplement: c6ra06798k1.pdf [file c6ra06798k1.pdf]

## Supplementary data

### ICG-conjugated Magnetic Graphene Oxide for Dual Photothermal and Photodynamic Therapy

*Ismail Ocsoy,<sup>1,2,3\*</sup> Nuran Isiklan,<sup>4</sup> Sena Cansiz,<sup>1</sup> Nalan Özdemir<sup>5</sup> and Weihong Tan<sup>1\*</sup>*

<sup>1</sup>Center for Research at the Bio/Nano Interface, Department of Chemistry and Shands Cancer Center, UF Genetics Institute and McKnight Brain Institute, University of Florida, Gainesville, Florida, 32611\*

<sup>2</sup>Department of Analytical Chemistry, Faculty of Pharmacy, Erciyes University, Kayseri, 38039 Turkey

<sup>3</sup>Nanotechnology Research Center (ERNAM), Erciyes University, Kayseri, 38039 Turkey

<sup>4</sup>Department of Chemistry, Science and Arts Faculty, Kırıkkale University, Kırıkkale, 7100 Turkey

<sup>5</sup>Department of Chemistry, Faculty of Science, Erciyes University, Kayseri, 38039 Turkey

A

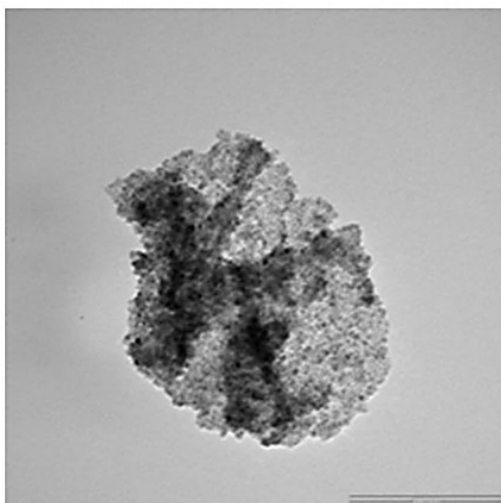

B

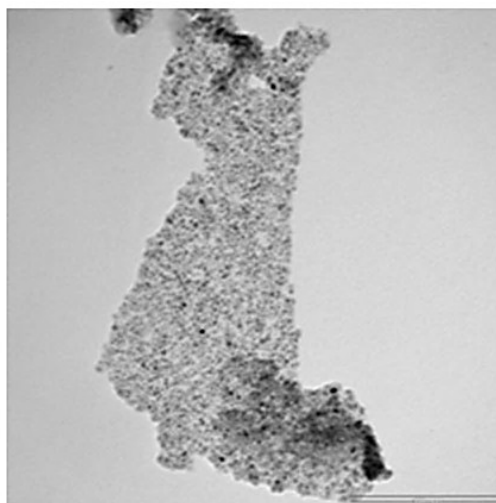

C

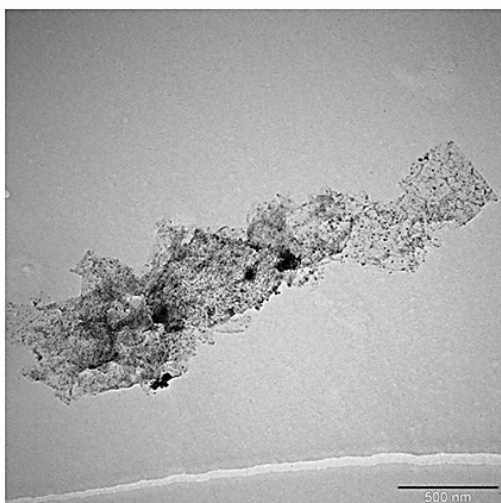

D

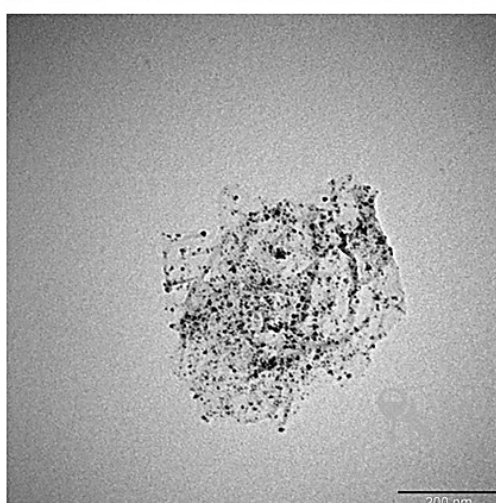

**Figure S1.** TEM images of mGO with different weight ratios of  $\text{Fe}(\text{acac})_3/\text{GO}$ . A) 5:1, B) 4:1, C) 3:1 and D) 2:1.

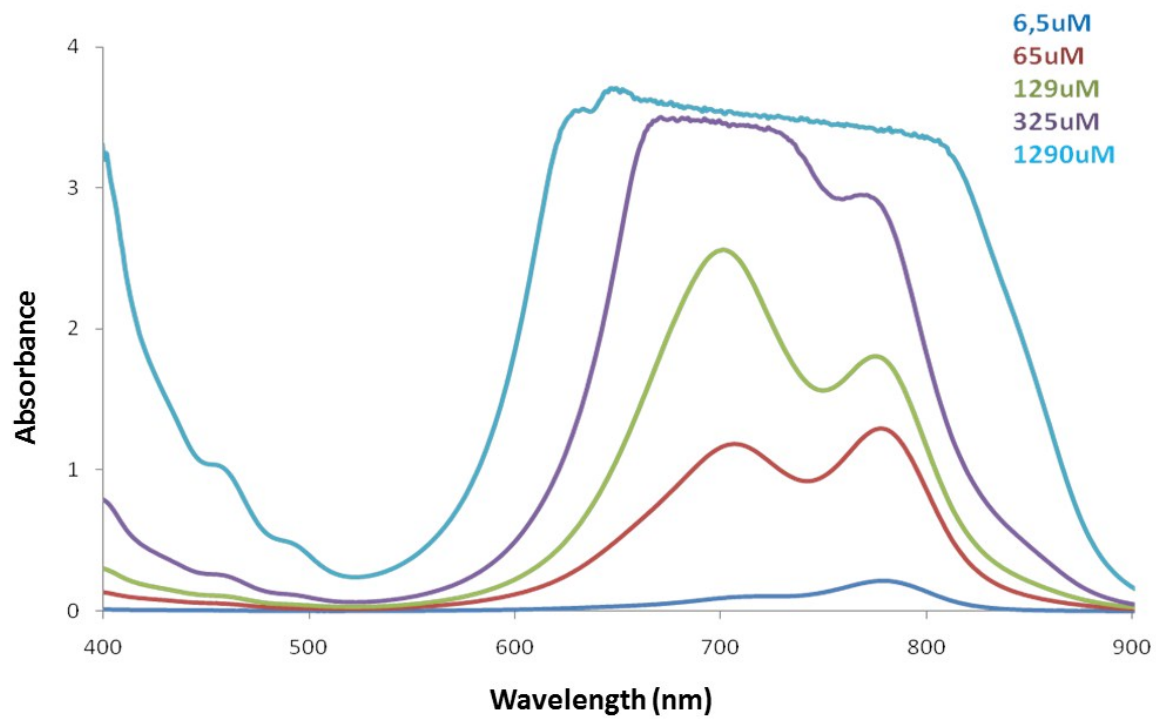

**Figure S2.** ICG concentration-dependent absorption spectra.

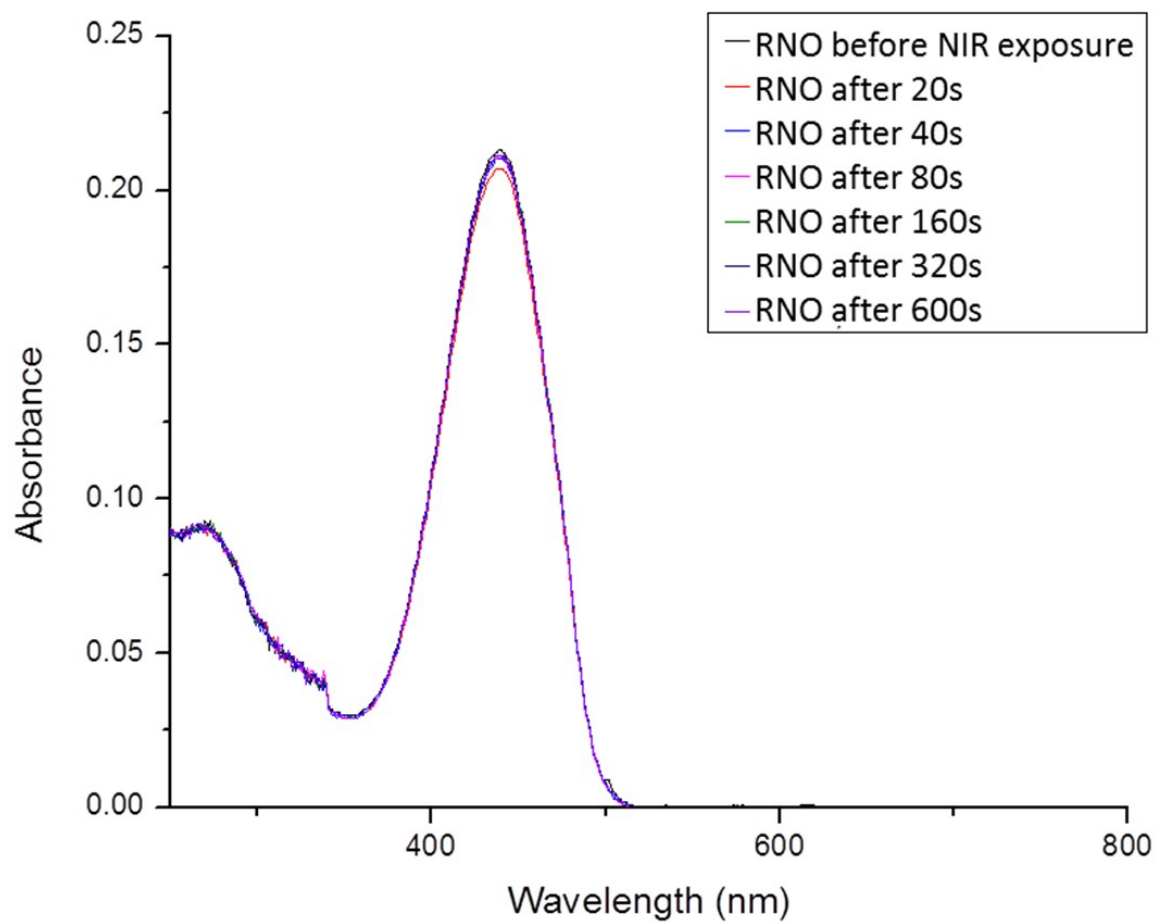

**Figure S3.** RNO absorption spectra recorded after time increments of NIR laser irradiation.

- [37] H. P. Cong, J. J. He, Y. Lu, S. H. Yu, *Small*. **2010**, 6, 169–173.
